# Supplementary material for: Fe3+–Co2+ species loaded on carbon as an effective pre-catalyst for oxygen evolution
Source: Royal Society of Chemistry journal article supplement (doi:10.1039/d0nj04934d), 2020-01-01
Supplement: d0nj04934d1.pdf [file d0nj04934d1.pdf]

Supporting Information for

**Fe<sup>3+</sup>-Co<sup>2+</sup> Species Loaded on Carbon as Effective Pre-catalyst for Oxygen  
Evolution**

Xueyang Wang,<sup>a</sup> Yuanjun Liu,<sup>b,\*</sup> Tiange Wei,<sup>a</sup> Xuefeng Song,<sup>a</sup> Xiaofang Cheng,<sup>b</sup> Xiaoping  
Shen,<sup>a</sup> Guoxing Zhu<sup>a,\*</sup>

<sup>a</sup>School of Chemistry and Chemical Engineering, Jiangsu University, Zhenjiang, 212013, China.

E-mail: zhuguoxing@ujs.edu.cn

<sup>b</sup>School of Environmental and Chemical Engineering, Jiangsu University of Science and  
Technology, Zhenjiang 202018, China. E-mail: liuyuanjun@just.edu.cn

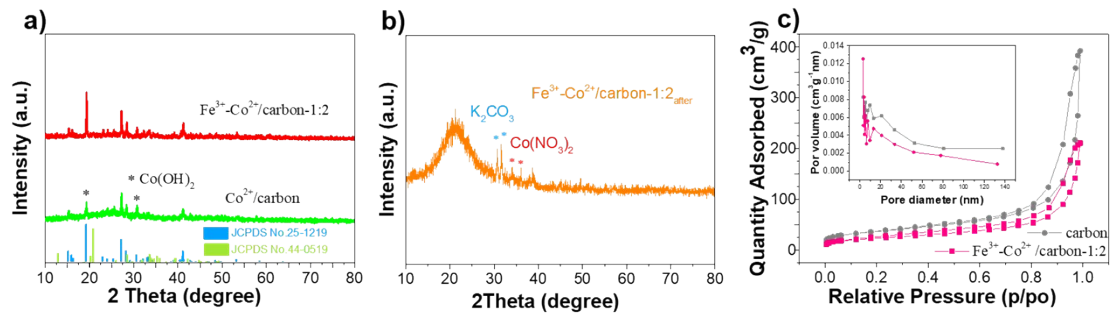

**Fig. S1.** XRD patterns for a) the typical samples including  $\text{Fe}^{3+}\text{-Co}^{2+}/\text{carbon-1:2}$ ,  $\text{Co}^{2+}/\text{carbon}$  and the standard patterns for  $\text{Co}(\text{NO}_3)_2 \cdot 6\text{H}_2\text{O}$  (JCPDS No.25-1219),  $\text{Fe}_4(\text{OH})_{11}\text{NO}_3 \cdot 2\text{H}_2\text{O}$  (JCPDS No. 44-0519) and b)  $\text{Fe}^{3+}\text{-Co}^{2+}/\text{carbon-1:2}_{\text{after}}$ . c) Nitrogen adsorption-desorption isotherms for carbon and  $\text{Fe}^{3+}\text{-Co}^{2+}/\text{carbon-1:2}$  (The inset figure shows the pore size distribution).

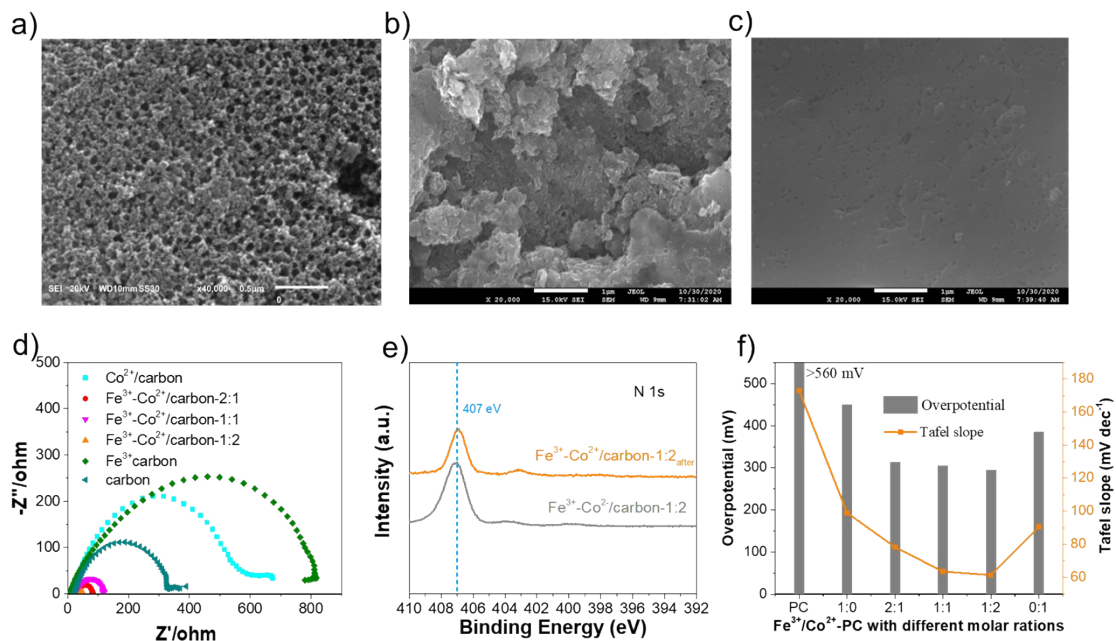

**Fig. S2.** a~c) SEM images of the porous carbon,  $\text{Fe}^{3+}\text{-Co}^{2+}/\text{carbon-1:2}$  and  $\text{Fe}^{3+}\text{-Co}^{2+}/\text{carbon-1:2}_{\text{after}}$ . d) Nyquist plots obtained at overpotential of 295 mV from all

samples. e) XPS spectrum of N 1s for Fe<sup>3+</sup>-Co<sup>2+</sup>/carbon-1:2 and Fe<sup>3+</sup>-Co<sup>2+</sup>/carbon-1:2<sub>after</sub> products. f) comparison results of the overpotential and Tafel slope values.

**Table S1.** Fe and Co contents in the Fe<sup>3+</sup>-Co<sup>2+</sup>/carbon composites determined by ICP-OES.

| Products                                                        | Fe content |       | Co content |       | Metal content<br>(Fe+Co) wt% | Fe <sup>3+</sup> :Co <sup>2+</sup><br>molar<br>ratios |
|-----------------------------------------------------------------|------------|-------|------------|-------|------------------------------|-------------------------------------------------------|
|                                                                 | mol%       | wt%   | mol%       | wt%   |                              |                                                       |
| Fe <sup>3+</sup> -Co <sup>2+</sup> /carbon-2:1                  | 2.97       | 11.81 | 1.63       | 6.84  | 18.65                        | 1.8:1                                                 |
| Fe <sup>3+</sup> -Co <sup>2+</sup> /carbon-1:1                  | 2.23       | 8.85  | 2.47       | 10.31 | 19.16                        | 1:1.1                                                 |
| Fe <sup>3+</sup> -Co <sup>2+</sup> /carbon-1:2                  | 1.43       | 5.63  | 3.41       | 14.18 | 19.81                        | 1:2.3                                                 |
| Fe <sup>3+</sup> -Co <sup>2+</sup> /carbon-1:2 <sub>after</sub> | 0.53       | 2.34  | 0.93       | 4.33  | 6.67                         | 1:1.7                                                 |

Detailed metal content testing procedures are as follows: Firstly, 5 mg of the sample was dissolved in 6 mol/L HCL solution and stirred for 24 h. The solution was filtered and was diluted to a final volume of 100 mL. The corresponding solution was used for ICP analysis.

**Table S2.** Comparisons of the OER performance for different catalysts.

| Catalysts                                      | Electrolyte | Overpotential<br>at 10 mA•cm <sup>-2</sup> | Tafel slope<br>(mV•dec <sup>-1</sup> ) | Refs.     |
|------------------------------------------------|-------------|--------------------------------------------|----------------------------------------|-----------|
| AB-Fe <sup>3+</sup> /Co <sup>2+</sup> -Nafion  | 1M KOH      | 330                                        | 55                                     | [1]       |
| NiCoO <sub>2</sub> @CFP                        | 1M KOH      | 303                                        | 57                                     | [2]       |
| NiO/CoN PINWs                                  | 1M KOH      | 300                                        | 35                                     | [3]       |
| Co <sub>3</sub> O <sub>4</sub> /NPC            | 1M KOH      | 390                                        | 58                                     | [4]       |
| NiCoSe <sub>2</sub> /NF                        | 1M KOH      | 183                                        | 88                                     | [5]       |
| Fe-Co-P/C                                      | 1M KOH      | 151                                        | 77.78                                  | [6]       |
| CP/CTS/Co-S                                    | 1M KOH      | 513                                        | 131                                    | [7]       |
| NF@NC-CoFe <sub>2</sub> O <sub>4</sub> powders | 1M KOH      | 350                                        | 74                                     | [8]       |
| CoFe <sub>2</sub> O <sub>4</sub> /PANI-MWCNTs  | 1M KOH      | 314                                        | 30.6                                   | [9]       |
| Fe <sub>3</sub> O <sub>4</sub> @NiSx/rGO       | 1M KOH      | 330                                        | 35.5                                   | [10]      |
| NiCo <sub>2</sub> O <sub>3</sub> @OMC          | 1M KOH      | 281                                        | 96.8                                   | [11]      |
| Fe <sup>3+</sup> -Co <sup>2+</sup> /carbon-1:2 | 1M KOH      | 295                                        | 61.3                                   | This work |

**Table S3.** Comparison of the TOF values of the different OER catalysts.

| Catalysts                                      | Current density at overpotential of 295 mV (mA/cm <sup>2</sup> ) | TOF (s <sup>-1</sup> ) |
|------------------------------------------------|------------------------------------------------------------------|------------------------|
| Fe <sup>3+</sup> /carbon                       | 0.28                                                             | 0.0008                 |
| Fe <sup>3+</sup> -Co <sup>2+</sup> /carbon-2:1 | 5.01                                                             | 0.0140                 |
| Fe <sup>3+</sup> -Co <sup>2+</sup> /carbon-1:1 | 8.34                                                             | 0.0229                 |
| Fe <sup>3+</sup> -Co <sup>2+</sup> /carbon-1:2 | 10                                                               | 0.0260                 |
| Co <sup>2+</sup> /carbon                       | 0.63                                                             | 0.0020                 |

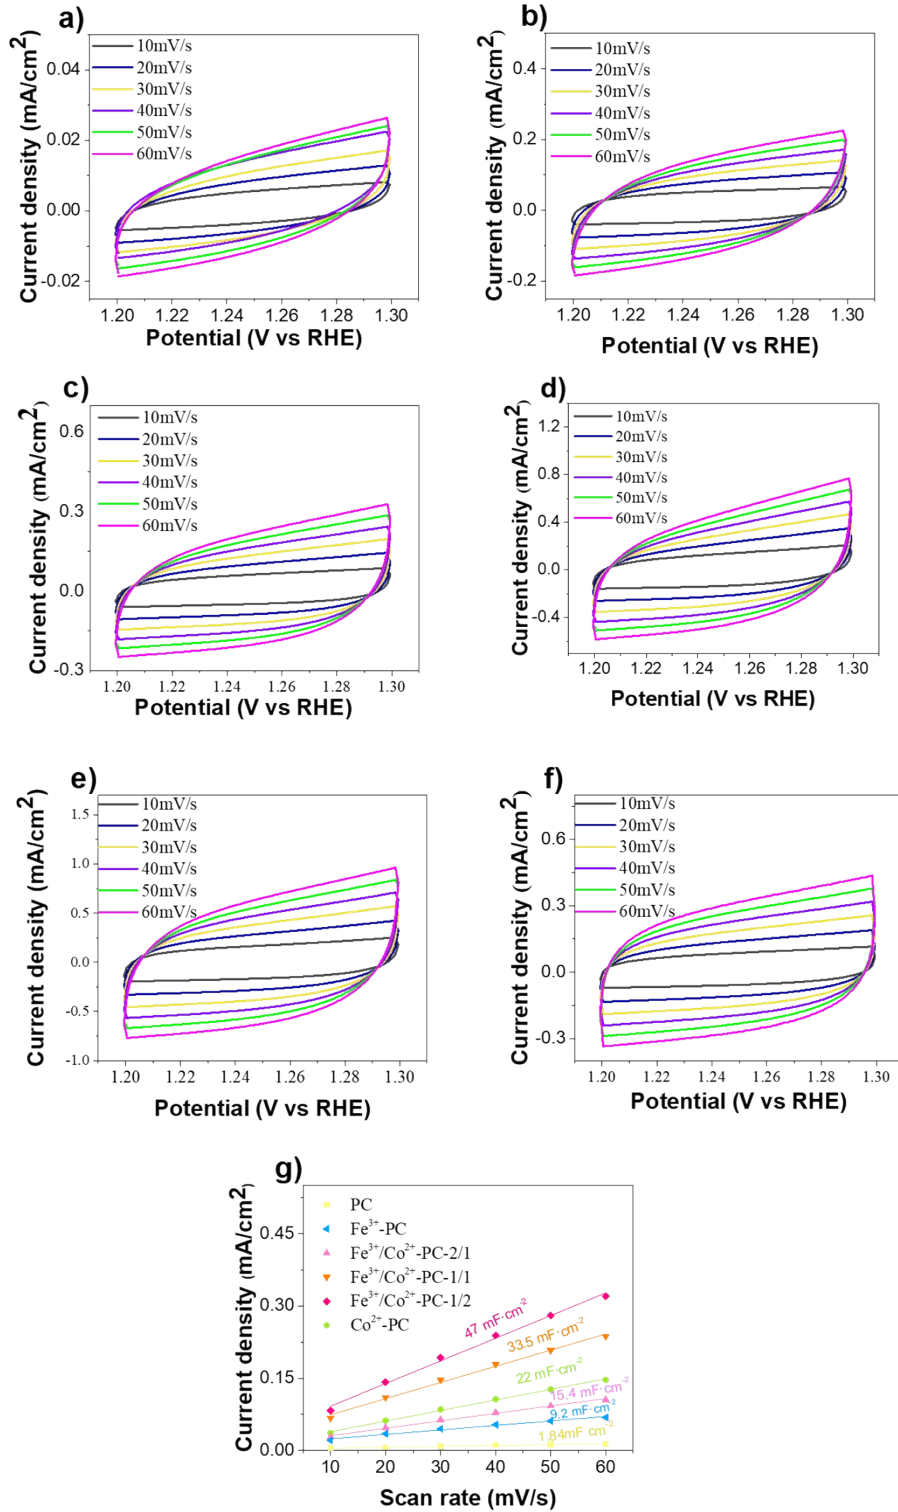

**Fig. S3.** a-f) CV curves of the carbon and Fe<sup>3+</sup>-Co<sup>2+</sup>/carbon composites (Fe<sup>3+</sup>:Co<sup>2+</sup> = 1:0, 2:1, 1:1, 1:2, and 0:1) g) Estimation of  $C_{dl}$  by plotting the current density vs scan rate to fit a linear regression for all samples.

## References :

- [1] Y. Yu, Y. Liu, S. Ju, X. Shen, Z. Ji, L. Kong, G. Zhu, *Inorg. Chem. Commun.*, 111, (2020), 107674.
- [2] Y. Yang, M. Zhou, W. Guo, X. Cui, Y. Li, F. Liu, P. Xiao, Y. Zhang, *Electrochim. Acta*, 174, (2015), 246-253.
- [3] J. Yin, Y. Li, F. Lv, Q. Fan, Y. Zhao, Q. Zhang, W. Wei, F. Cheng, P. Xi, S. Guo, *ACS Nano*, 11, (2017), 2275-2283.
- [4] J. Sun, Y. Yang, J. Wang, Z. Zhang, J. Guo, *J. Alloy. Compd.*, 827, (2020), 154308.
- [5] A. Kamran, J. Jae, K. Minsoo, J. Junkyeong, Y. Yeonjin, C. Seung-Hyun, *ACS Sustain. Chem. Eng.*, 6, (2018), 7735-7742.
- [6] X. Li, X. Qian, Y. Xu, H. Wu, Y. Dan, L. Chen, Q. Yu, *Electrochim. Acta*, 321, (2019), 134646.
- [7] J. Wang, H. Zhong, Z. Wang, F. Meng, X. Zhang, *ACS Nano*, 10, (2016), 2342-2348.
- [8] X. Lu, L. Gu, J. Wang, J. Wu, P. Liao, G. Li, *Adv. Mater.*, 29, (2017), 1604437.
- [9] Y. Liu, J. Li, F. Li, W. Li, H. Yang, X. Zhang, Y. Liu, J. Ma, *J. Mater. Chem. A*, 4, (2016), 4472-4478.
- [10] G. Zhu, X. Xie, X. Li, Y. Liu, X. Shen, K. Xu, S. Chen, *ACS Appl. Mater. Interf.*, 10, (2018), 19258.

- [11] Y. Zhang, X. Wang, F. Luo, Y. Tan, L. Zeng, B. Fang, A. Liu, *Appl. Catal. B-Environ.*, 256, (2019), 117852.
